# Supplementary material
Source: publisher figshare collection journal article supplement (https://frontiersin.figshare.com/ndownloader/files/27526184)
Supplement: Supplementary file 1 [file 27526184]

## Sheet: Rate of publication
Year	Aquaculture	Future Food	Cumulative hits	Food		Year	Food	Cumulative hits		Year	Education	Food	Climate change	Economy	Sport
2004	644	665	2427	2427		1979	2427	9880		1979	3346	2427	14	1250	303
2009	1293	1418	4985	2558		1984	2558	22049		1984	3435	2558	35	1503	413
2014	2050	2692	7610	2625		1989	2625	35575		1989	3590	2625	127	1619	413
2019	4220	5808	17595	9985		1994	9985	75666		1994	8067	9985	1262	3614	1058
2024 (Estimated using ARIMA time series p,d,q : 1,1,1)	5118	7128	31210	13615		1999	13615	137421		1999	11446	13615	2647	4757	1698
			49324	18114		2004	18114	217827		2004	15379	18130	4357	5484	2482
			79529	30205		2009	30205	340779		2009	29213	30207	11174	11862	5277
			120997	41468		2014	41468	527178		2014	46111	41465	20934	15153	7775
			192954	71957		2019	71957	830413		2019	93748	72698	38014	31291	14725
			278878	85924		2024	85924	1246337		2024	102885	80383	42012	34349	16240

## Sheet: 2018 Production & value
	Production (million metric tons)		Value (billion USD)		Cost per million metric tonnes (USD billion)
Aquatic plants	32.38		13.28		0.41
	Production (million metric tons)		Value (billion USD)		Cost per million metric tonnes (USD billion)
Finfish	54.27		139.71		2.57
	Production (million metric tons)		Value (billion USD)		Cost per million metric tonnes (USD billion)
Shellfish	26.92		104.18		3.86
Total	113.57		257.17		6.84
(A) Global Aquaculture Production	Production (%)	(B) Global Aquaculture Value	Value (%)	(C) Cost per million metric tonnes	Cost per million metric tonnes (%)
Aquatic plants	0.285111	Aquatic plants	0.051639	Aquatic plants	0.0599415
	Production ((%)		Value (%)		Cost per million metric tonnes (%)
Finfish	0.477855	Finfish	0.543259	Finfish	0.375731
	Production (%)		Value (%)		Cost per million metric tonnes (%)
Shellfish	0.237034	Shellfish	0.405102	Shellfish	0.564327
Total	1		1	(C) Cost per million metric tonnes	Cost per million metric tonnes (%)

## Sheet: Percentage culture species
Aquaculture group	Shellfish	Finfish (exclude diadromous species)	Aquatic plants	Others	total
Percentage	0.521739	0.347826	0.0869565	0.0434783	1
Number of species	23	42	5	3	73
Marine based species	24	16	4	2	46

## Sheet: Shellfish production & value
Shellfish Production	Total Production (mmt)	Value (billion USD)
1985	2.76	3.56
1988	4.1	7.98
1991	4.73	10.21
1994	7.73	14.82
1997	9.35	16.33
2000	11.5	18.71
2003	14.4	21.48
2006	17.1	29.11
2009	18.9	41.2
2012	20.5	60.4
2015	23	77.67
2018	27	104.55
